# Supplementary material for: Development of a new highly sensitive serotonin sensor based on green synthesized silver nanoparticle decorated reduced graphene oxide
Source: Royal Society of Chemistry journal article supplement (doi:10.1039/d1ay01532j), 2021-01-01
Supplement: d1ay01532j1.pdf [file d1ay01532j1.pdf]

## Supplementary information

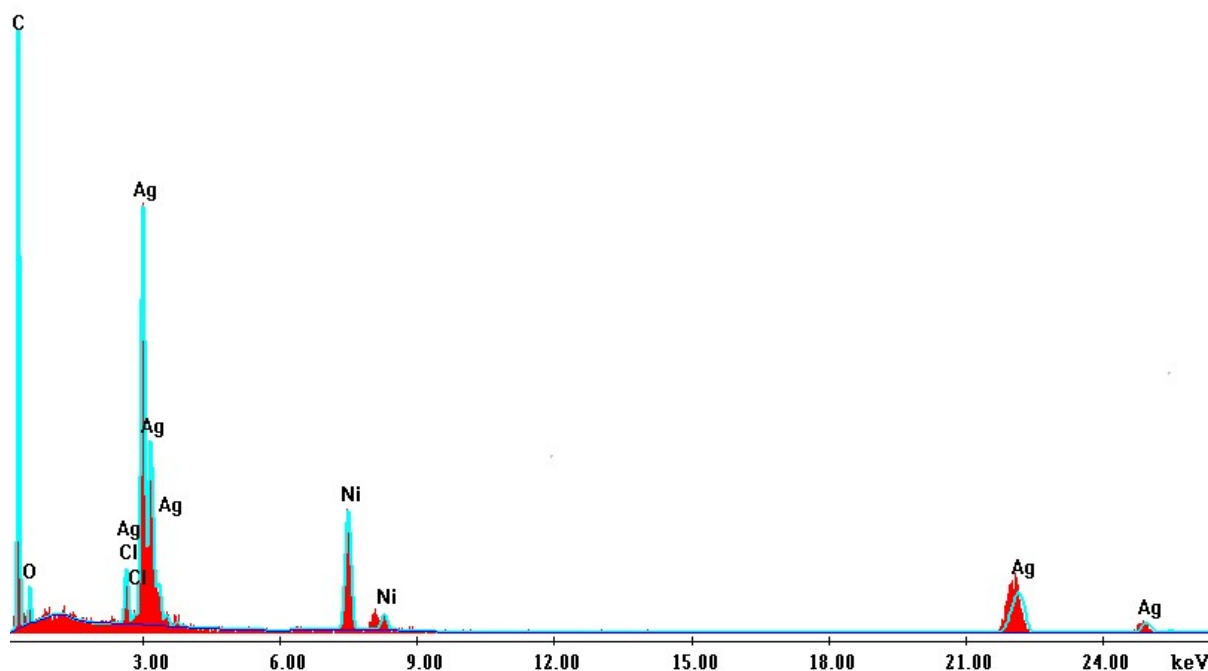

Fig. 1 EDX showing the presence of Ag, C and O

### pH effect

The effect of pH on the response for 1  $\mu$ M of serotonin over the pH range 3-12 and data (Figure below). The peak current of 5-HT increasing with the decreasing the pH of the solution. However, there are no big change in signal over the range (3 to 7). Compared with other pH solutions, pH 7 solution (PBS) is considered as a physiological pH; hence it has been used as an optimum pH for the determination of 5-HT. For this reason, we choose to work with pH around 7.

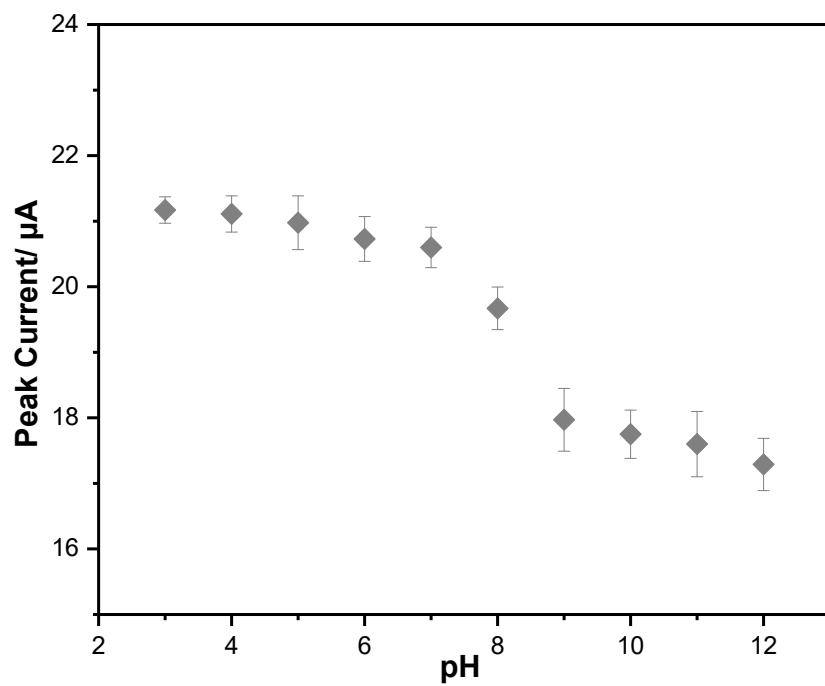

**Fig. 2: Effect of pH on the peak current ( $i_p$ ) of 1  $\mu\text{M}$  5-HT ( $n=3$ ) in 0.1 M phosphate buffer**
